# Supplementary material for: Hierarchical nickel nanowire@NiCo2S4 nanowhisker composite arrays with a test-tube-brush-like structure for high-performance supercapacitors
Source: Royal Society of Chemistry journal article supplement (doi:10.1039/c8ta04727h), 2018-01-01
Supplement: c8ta04727h1.pdf [file c8ta04727h1.pdf]

## Electronic Supplementary Information

### **Hierarchical nickel nanowire@NiCo<sub>2</sub>S<sub>4</sub> nanowhiskers composite arrays with test-tube-brush-like structure for high-performance supercapacitors**

Jie Liao<sup>a</sup>, Peichao Zou<sup>a</sup>, Songyang Su<sup>a</sup>, Adeela Nairan<sup>a</sup>, Yang Wang<sup>a</sup>, Dang Wu<sup>a</sup>,  
Ching-Ping Wong<sup>b,c</sup>, Feiyu Kang<sup>a,d</sup>, Cheng Yang<sup>a,\*</sup>

<sup>a</sup>Division of Energy and Environment, Graduate School at Shenzhen, Tsinghua University, Shenzhen, 518055, China.

<sup>b</sup>School of Materials Science and Engineering, Georgia Institute of Technology, 771 Ferst Dr., Atlanta, GA 30332, USA.

<sup>c</sup>Department of Electronic Engineering, The Chinese University of Hong Kong, Shatin, Hong Kong, China.

<sup>d</sup>School of Materials Science and Engineering, Tsinghua University, Beijing 100084, China.

\*Corresponding Author: yang.cheng@sz.tsinghua.edu.cn

#### **Fabrication of NNA@NiCo<sub>2</sub>S<sub>4</sub> with different mass loadings**

The synthesis of NNA@NiCo<sub>2</sub>S<sub>4</sub> follows a two-step hydrothermal method. Typically, 0.25 g Co(NO<sub>3</sub>)<sub>2</sub>·6H<sub>2</sub>O, 0.12 g Ni(NO<sub>3</sub>)<sub>2</sub>·6H<sub>2</sub>O and 0.09 g urea were dissolved in 60 mL deionized water to form a transparent pink solution followed by immersing a piece of NNA (2 cm × 2 cm) into the solution. This solution containing NNA was then transferred to a 100 mL Teflon-lined stainless steel autoclave and aged at 120°C for 10 hours. After the first hydrothermal step, the NNA deposited with nickel cobalt carbonate hydroxide precursor (NNA@precursor) sample was taken out and rinsed with ethanol and deionized water for several times and then dried at 60°C for 12 hours. In the second step of the hydrothermal reaction, the NNA@precursor samples were immersed in an aqueous solution containing 0.01 M thioacetamide (TAA) and transferred to a 100 mL Teflon-lined stainless steel autoclave and kept at 180°C for 5h. Later on, the samples were taken out and rinsed with ethanol and deionized water for several times, followed by drying process at 60°C for 12 hours. The mass loading of NNA@NiCo<sub>2</sub>S<sub>4</sub> was controlled by simply changing the concentration of the solution during the first hydrothermal process. The concentrations of the solutions are given in Table S1. The scanning electron microscope (SEM) images of the NNA@NiCo<sub>2</sub>S<sub>4</sub> with different mass loadings are shown in Figure S3.

#### **Fabrication of nickel foam@NiCo<sub>2</sub>S<sub>4</sub> (NFNCS) and carbon clothes@NiCo<sub>2</sub>S<sub>4</sub> (CCNCS)**

The fabrication of NFNCS and CCNCS follows a two-step hydrothermal method. Typically, 1.00 g Co(NO<sub>3</sub>)<sub>2</sub>·6H<sub>2</sub>O, 0.5 g Ni(NO<sub>3</sub>)<sub>2</sub>·6H<sub>2</sub>O and 0.36 g urea were dissolved in 60 mL deionized water to form a transparent pink solution followed by

immersing a piece of nickel foam (NF) or carbon clothes (CC) (2 cm × 2 cm) into the solution. The solution containing NF or CC was then transferred to a 100 mL Teflon-lined stainless steel autoclave and aged at 120°C for 10 hours. Then the NF or CC coated with nickel cobalt carbonate hydroxide precursor was taken out and rinsed with ethanol and deionized water for several times and then dried at 60°C for 12 hours. In the second step of the hydrothermal reaction, the NF@precursor or CC@precursor samples were immersed in 0.01 M thioacetamide (TAA) solution and transferred to a 100 mL Teflon-lined stainless steel autoclave and kept at 180°C for 5h. Later on, the samples were taken out and rinsed with ethanol and deionized water for several times, followed by drying process at 60°C for 12 hours.

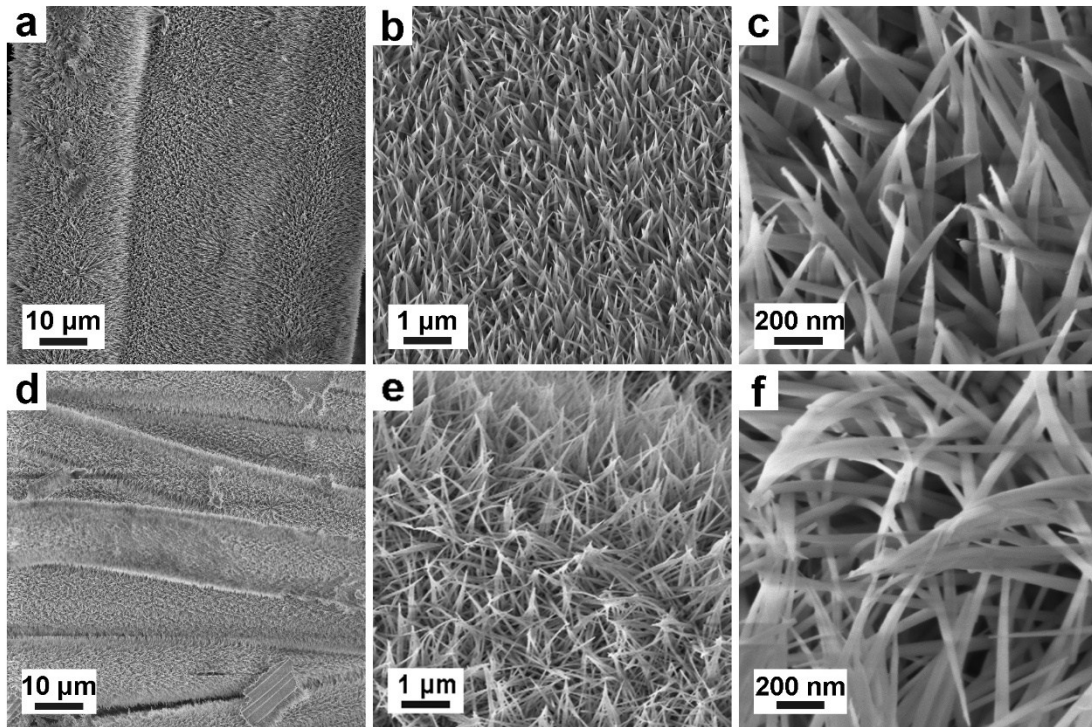

**Figure S1.** a)-c) SEM images of the nickel foam@NiCo<sub>2</sub>S<sub>4</sub> (NFNCS) composite materials at different magnifications. d)-f) SEM images of the carbon clothes@NiCo<sub>2</sub>S<sub>4</sub> (CCNCS) composite materials at different magnifications.

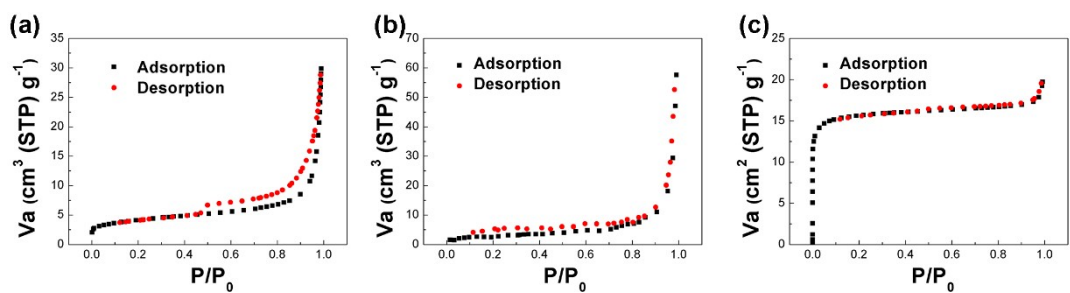

**Figure S2.** Nitrogen adsorption/desorption isotherms for: a) NFNCS. b) CCNCS. c) NNANCS. The specific surface areas of NFNCS, CCNCS, and NNANCS are calculated to be 14.90, 11,84 and 61.30  $\text{m}^2 \text{g}^{-1}$ , respectively.

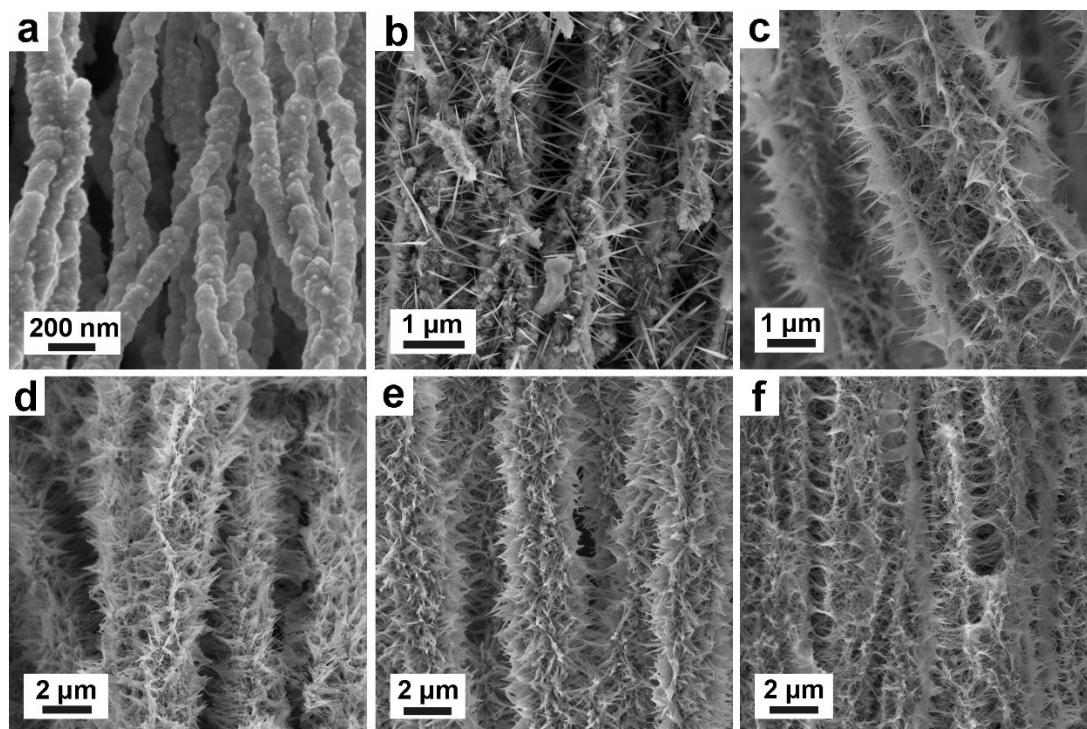

**Figure S3.** SEM images of: a) bare nickel nanowire arrays and (b-f) NNA@NiCo<sub>2</sub>S<sub>4</sub> obtained by treating with b) solution 1, c) solution 2, d) solution 3, e) solution 4, and f) solution 5.

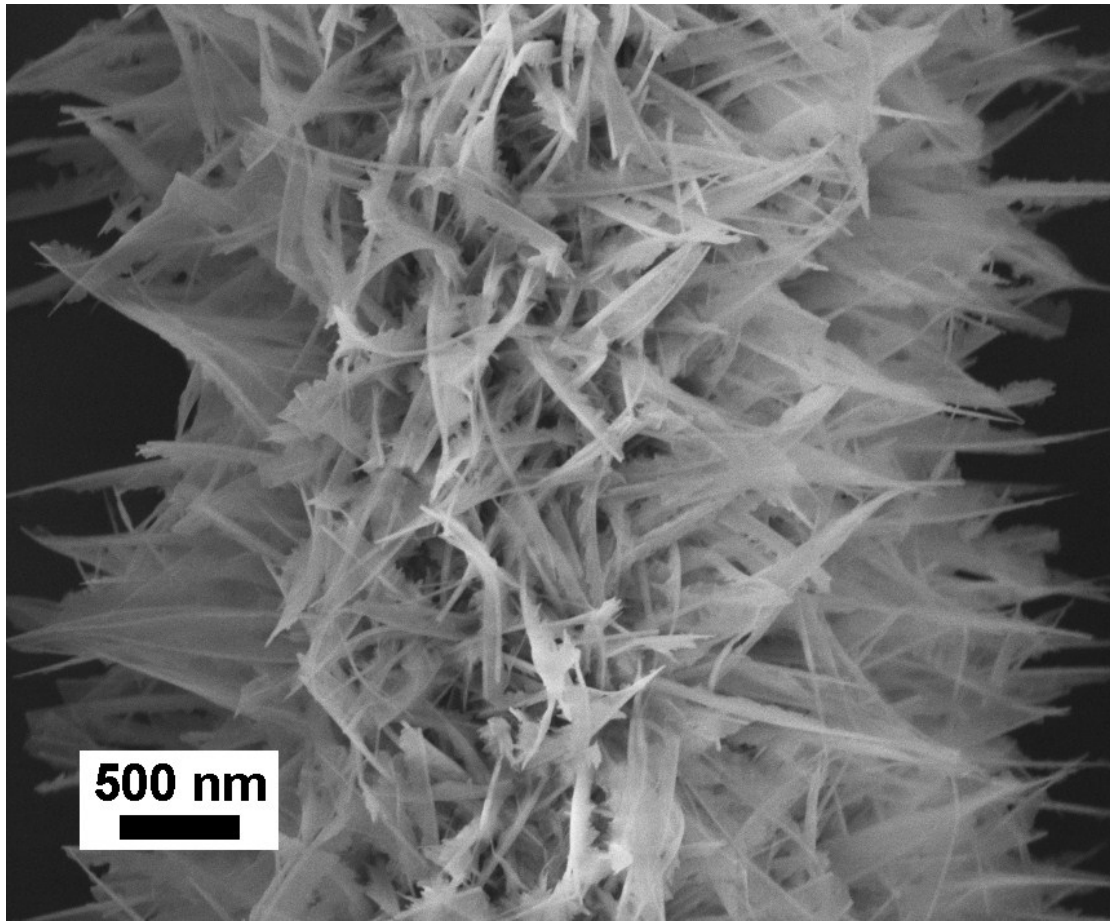

**Figure S4.** SEM image of the NNA@NiCo<sub>2</sub>S<sub>4</sub> electrode after repeated charging/discharging at 5 A g<sup>-1</sup> for 20,000 cycles.

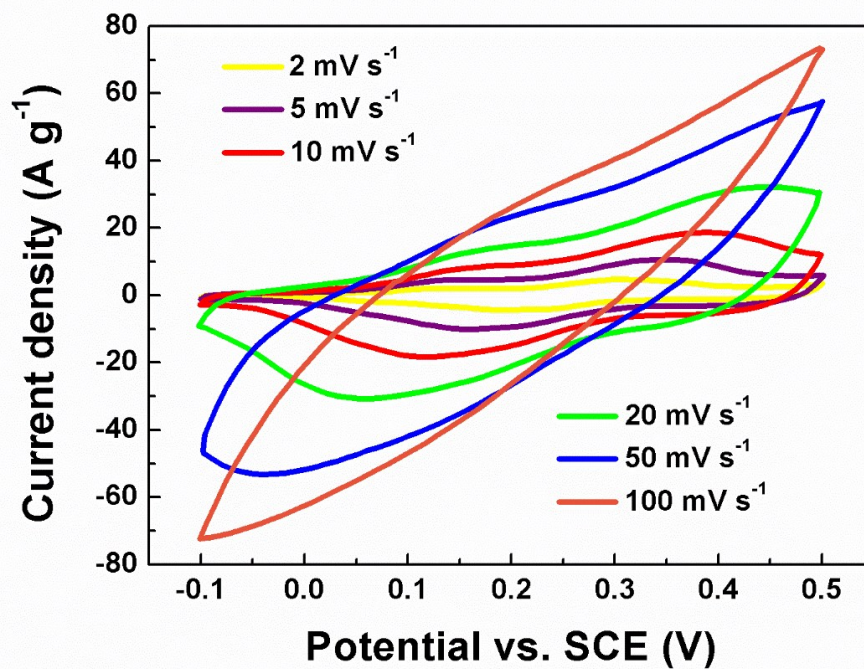

**Figure S5.** Cyclic voltammety curves of the NNA@NiCo<sub>2</sub>S<sub>4</sub> with a mass loading of 10.57 mg cm<sup>-2</sup> at various scan rates.

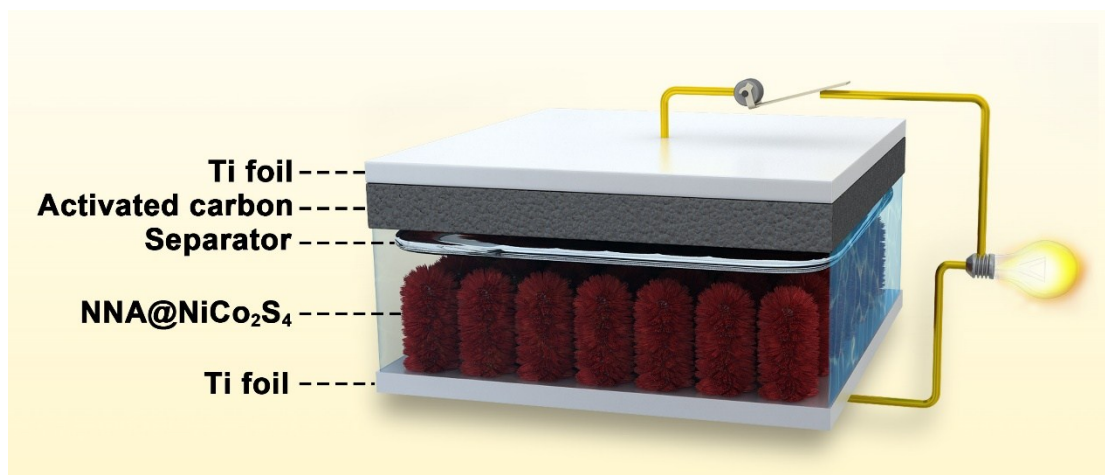

**Figure S6.** Schematic illustration of the asymmetric supercapacitor



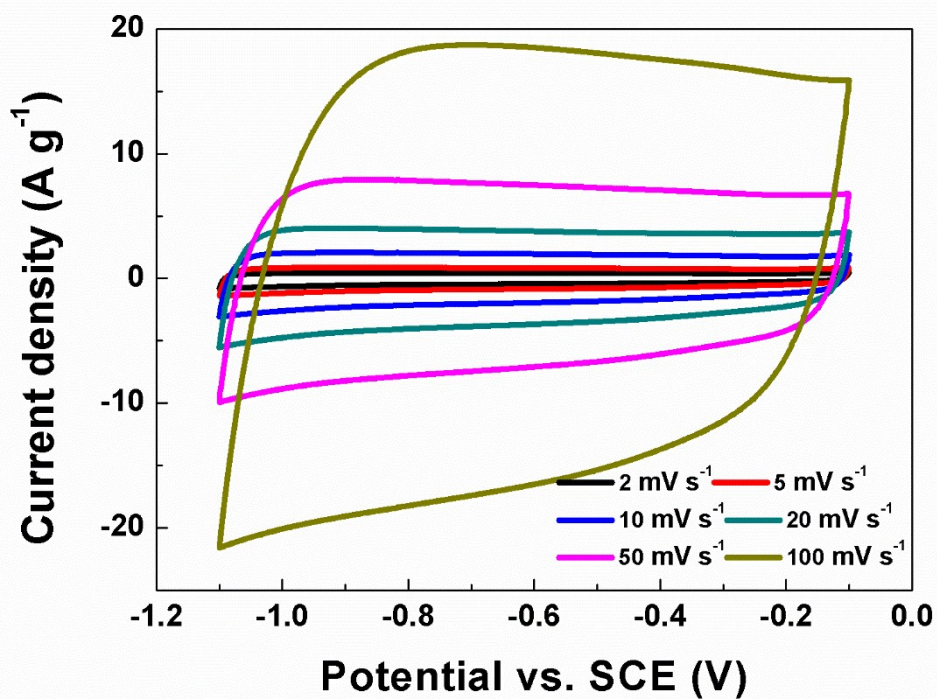

Figure S7. Cyclic voltammograms of the activated carbon electrode at various scan rates.

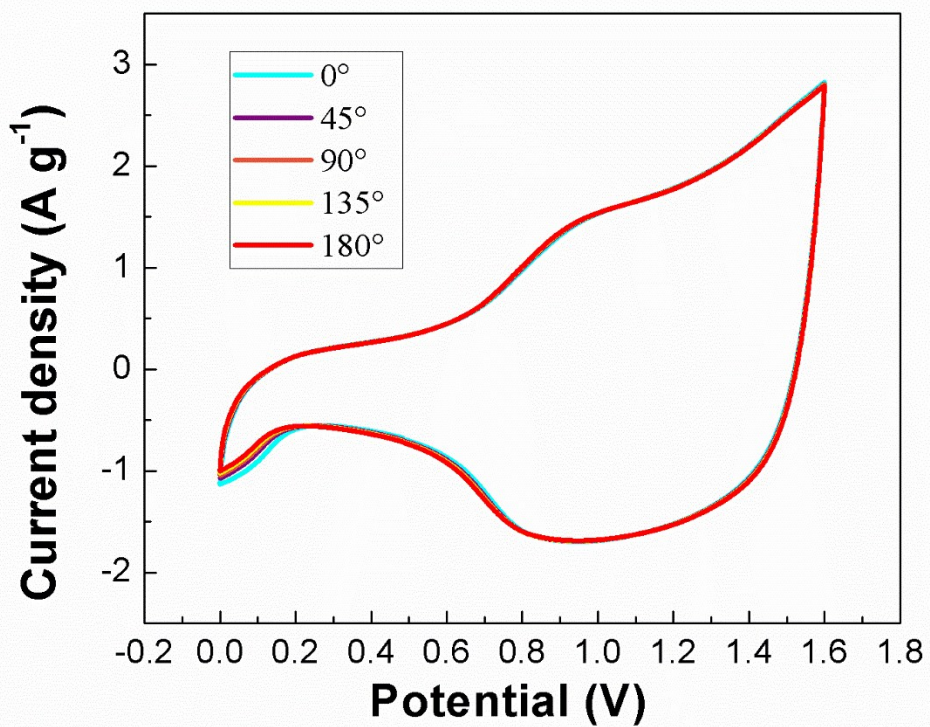

**Figure S8.** Cyclic voltammetry curves of the asymmetric supercapacitor under different bending angles at the scan rate of 5 mV/s.

**Table S1.** The mass loadings of NNA@NiCo<sub>2</sub>S<sub>4</sub> and NNA@precursors obtained from different concentrations of solutions in the first hydrothermal step.

| Solution | Masses of solutes in 60 mL water<br>(g) |                                   |      | Mass loading<br>of precursor<br>(mg) | Mass loading<br>of NiCo <sub>2</sub> S <sub>4</sub><br>(mg) |
|----------|-----------------------------------------|-----------------------------------|------|--------------------------------------|-------------------------------------------------------------|
|          | Co(NO <sub>3</sub> ) <sub>2</sub>       | Ni(NO <sub>3</sub> ) <sub>2</sub> | Urea |                                      |                                                             |
| 1        | 0.25                                    | 0.12                              | 0.09 | 0.85                                 | 0.81                                                        |
| 2        | 0.50                                    | 0.25                              | .018 | 2.47                                 | 2.36                                                        |
| 3        | 1.00                                    | 0.50                              | 0.36 | 4.21                                 | 4.03                                                        |
| 4        | 2.00                                    | 1.00                              | 0.72 | 7.18                                 | 6.82                                                        |
| 5        | 3.00                                    | 1.50                              | 1.08 | 11.03                                | 10.57                                                       |

**Table S2.** Electrochemical performances of Ni-Co sulfide electrodes from recent reports.

| Ref       | Capacitance at current density                 | Rate retention                    | Cycling stability        | Energy density at Power density                        |
|-----------|------------------------------------------------|-----------------------------------|--------------------------|--------------------------------------------------------|
| This work | 1,523 F/g at 1 A/g                             | 61.8% from 1~40 A/g               | 92.4% after 20000 cycles | 47.29 W h kg <sup>-1</sup> at 793.5 W kg <sup>-1</sup> |
| 1         | 1351 F/g at 1 A/g                              | 58.6% from 1~10 A/g               | 80.1% after 5,000 cycles | 42.55 W h kg <sup>-1</sup> at 458.8 W kg <sup>-1</sup> |
| 2         | 1440 F/g at 3 A/g                              | 75.1% from 2~50 A/g               | 91.7% after 5000 cycles  | 28.3 W h kg <sup>-1</sup> at 245 W kg <sup>-1</sup>    |
| 3         | 1036 F/g at 1 A/g                              | 68.1% from 1~20 A/g               | 78.6% after 10000 cycles | 22.9 W h kg <sup>-1</sup> at 10208 W kg <sup>-1</sup>  |
| 4         | 1492 F/g at 1 A/g                              | 96% from 1~50 A/g                 | 90% after 8000 cycles    | 43.3 W h kg <sup>-1</sup> at 800 W kg <sup>-1</sup>    |
| 5         | 1016 F/g at 2 A/g                              | 79% from 2~20 A/g                 | 87% after 10000 cycles   | 42.7 W h kg <sup>-1</sup> at 1583 W kg <sup>-1</sup>   |
| 6         | 1437 F/g at 1 A/g                              | 61.7% from 1~30 A/g               | 92.1% after 5000 cycles  | 39.5 W h kg <sup>-1</sup> at 1778 W kg <sup>-1</sup>   |
| 7         | 14.39 F/cm <sup>2</sup> at 5 A/cm <sup>2</sup> | 66.7% from 5~30 A/cm <sup>2</sup> | 92% after 5000 cycles    | 16.6 W h kg <sup>-1</sup> at 2348 W kg <sup>-1</sup>   |
| 8         | 1154 F/g at 1 A/g                              | 62.3% from 1~20 A/g               | 107% after 8000 cycles   | 17.3 W h kg <sup>-1</sup> at 1A/g                      |
| 9         | 1231 F/g at 2 A/g                              | 71.2% from 2~20 A/g               | 90.4% after 2000 cycles  | 45.5 W h kg <sup>-1</sup> at 512 W kg <sup>-1</sup>    |
| 10        | 895.2 F/g at 1 A/g                             | 65.4% from 1~20 A/g               | 85.7% after 1,500 cycles | ---                                                    |
| 11        | 1048 F/g at 3 A/g                              | 50.1% from 3~10 A/g               | 75.9% after 5,000 cycles | ---                                                    |
| 12        | 1777 F/g at 1 A/g                              | 40.5% from 1~20 A/g               | 83% after 3,000 cycles   | ---                                                    |
| 13        | 1149 F/g at 1 A/g                              | 66.2% from 1~50 A/g               | 91.4% after 5,000 cycles | ---                                                    |

## Reference:

1. B. Yang, L. Yu, H. Yan, Y. Sun, Q. Liu, J. Liu, D. Song, S. Hu, Y. Yuan, L. Liu and J. Wang, *J. Mater. Chem. A*, 2015, **3**, 13308-13316.
2. Y. Zhu, Z. Wu, M. Jing, X. Yang, W. Song and X. Ji, *J. Power Sources*, 2015, **273**, 584-590.
3. L. Shen, L. Yu, H. B. Wu, X. Y. Yu, X. Zhang and X. W. Lou, *Nat. Commun.*, 2015, **6**, 6694-6702.
4. J. Yang, C. Yu, X. Fan, S. Liang, S. Li, H. Huang, Z. Ling, C. Hao and J. Qiu, *Energy Environ. Sci.*, 2016, **9**, 1299-1307.
5. B. Y. Guan, L. Yu, X. Wang, S. Song and X. W. Lou, *Adv. Mater.*, 2017, **29**, 5051-5056.
6. X. Wang, S.-X. Zhao, L. Dong, Q.-L. Lu, J. Zhu and C.-W. Nan, *Energy Storage Mater.*, 2017, **6**, 180-187.
7. H. Chen, J. Jiang, L. Zhang, D. Xia, Y. Zhao, D. Guo, T. Qi and H. Wan, *J. Power Sources*, 2014, **254**, 249-257.
8. X. Xiong, G. Waller, D. Ding, D. Chen, B. Rainwater, B. Zhao, Z. Wang and M. Liu, *Nano Energy*, 2015, **16**, 71-80.
9. L. Shen, J. Wang, G. Xu, H. Li, H. Dou and X. Zhang, *Adv. Energy Mater.*, 2015, **5**, 1400977.
10. L. Yu, L. Zhang, H. B. Wu and X. W. Lou, *Angew. Chem. Int. Ed. Engl.*, 2014, **53**, 3711-3714.
11. Y. Zhang, M. Ma, J. Yang, C. Sun, H. Su, W. Huang and X. Dong, *Nanoscale*, 2014, **6**, 9824-9830.
12. X. Chen, D. Chen, X. Guo, R. Wang and H. Zhang, *ACS. Appl. Mater. Interfaces*, 2017, **9**, 18774-18781.
13. H. Chen, J. Jiang, L. Zhang, H. Wan, T. Qi and D. Xia, *Nanoscale*, 2013, **5**, 8879-8883.
